# Supplementary material for: Effect of a Skin Self-monitoring Smartphone Application on Time to Physician Consultation Among Patients With Possible Melanoma: A Phase 2 Randomized Clinical Trial
Source: PubMed Central journal article supplement (PMC7137684; doi:10.1001/jamanetworkopen.2020.0001), 2020-02-26
Supplement: jamanetwopen-3-e200001-s001.pdf [file jamanetwopen-3-e200001-s001.pdf]

## Supplementary Online Content

Walter FM, Pannebakker MM, Barclay ME, et al. Effect of a skin self-monitoring smartphone application on time to physician consultation among patients with possible melanoma: a phase 2 randomized clinical trial. *JAMA Netw Open*. 2020;3(2):e200001.  
doi:10.1001/jamanetworkopen.2020.0001

**eFigure.** Smartphone Application Screenshots

**eTable.** Descriptive Results on Coprimary Outcomes During Trial Follow-up

This supplementary material has been provided by the authors to give readers additional information about their work.

**eFigure. Smartphone Application Screenshots**

**MySkinPal**  
Mole Tracking & Analysis

[How It Works](#) [For Health Professionals](#) [Skin Cancer Facts](#)

### How It Works

- **1. We Make Mole Tracking Easy**  
You take pictures of your moles and we store them on your device along with dates and other information. We never upload or save your information anywhere else. It's your health data, and only you should own it.
- **2. We Help You Analyze**  
You can playback your pictures to see how moles are evolving over time. You can also add color filters to help you identify malignant patterns.
- **3. We Send You Reminders**  
When a mole hasn't been scanned in a while, we remind you of it. At intervals of your choosing.
- **4. Easily Share Your Data With a Doctor**  
If you find a mole that concerns you, you can quickly share your mole history with a dermatologist near you.
- **5. Keep Your Family Healthy**  
Check your moles and those of your family members directly from the same app.

## The Easiest Way To Track Your Moles

-  Take Pictures
-  Get Reminders
-  Share With Real Doctors

### Body Diagram

#### Upper Body



① Use two fingers to zoom.



### Dashboard

Current User: Peter

✔ All moles have been scanned recently. Next scan is due in 15 days.

#### Recent moles



-  Add Mole Photo
-  Open Body Diagram
-  Full Body Scan

**eTable. Descriptive Results on Coprimary Outcomes During Trial Follow-up**

| Co-primary outcome                    | Control N | Control mean | (Control SD) | Intervention N | Intervention mean | (Intervention SD) |
|---------------------------------------|-----------|--------------|--------------|----------------|-------------------|-------------------|
| Consultation rate per person per year | 119       | 0.22         | (0.75)       | 119            | 0.21              | (0.66)            |
| Patient interval (days)               | 11        | 61.1         | (96.1)       | 8              | 40.9              | (35.0)            |
